# Supplementary material
Source: HighWire-hosted journal article supplement (https://tobaccocontrol.bmj.com/content/33/2/240)
Supplement: inline-supplementary-material-2 [file inline-supplementary-material-2.pdf]

**Supplementary File 2: Tobacco Excise Taxes and Consumers Price Index: 2010-2020**

| <b>Year</b>       | <b>Excise Tax<sup>1</sup><br/>(cents per stick)</b> | <b>Consumers Price<br/>Index: 2010 Q4 Base<sup>2</sup></b> |
|-------------------|-----------------------------------------------------|------------------------------------------------------------|
| 2010 <sup>3</sup> | 34.587                                              | 1.000                                                      |
| 2011              | 38.614                                              | 1.045                                                      |
| 2012              | 44.210                                              | 1.060                                                      |
| 2013              | 49.011                                              | 1.070                                                      |
| 2014              | 54.539                                              | 1.086                                                      |
| 2015              | 60.590                                              | 1.089                                                      |
| 2016              | 66.851                                              | 1.094                                                      |
| 2017              | 73.813                                              | 1.117                                                      |
| 2018              | 82.658                                              | 1.130                                                      |
| 2019              | 92.487                                              | 1.146                                                      |
| 2020              | 103.090                                             | 1.175                                                      |

1. Source: New Zealand Customs, [www.customs.govt.nz/about-us/news/importantnotices/new-excise-duties-rates-for-tobacco-and-tobaccoproducts](http://www.customs.govt.nz/about-us/news/importantnotices/new-excise-duties-rates-for-tobacco-and-tobaccoproducts)
2. Source: StatsNZ, <https://www.stats.govt.nz/indicators/consumers-price-index-cpi>
3. Increase in 2010 on 29 April. Increase in all other years on 1 January.
